# Supplementary material for: Manipulating the inorganic motif by kinetic control of antimony halide organic–inorganic hybrid materials for larger Stokes shift and significantly enhanced quantum efficiency
Source: Royal Society of Chemistry journal article supplement (doi:10.1039/d2cc04401c), 2022-01-01
Supplement: d2cc04401c1.pdf [file d2cc04401c1.pdf]

# Supporting Information

## Manipulating the inorganic motif by kinetic control of organic-inorganic antimony halide for larger Stokes shift and significantly enhanced quantum efficiency

Fang Lin,<sup>[a]</sup> Hua Tong,<sup>[b]</sup> Haoran Lin<sup>[a]</sup> and Wei Liu\*<sup>[b]</sup>

[a] F. Lin, H. Lin

Hoffmann Institute of Advanced Materials

Shenzhen Polytechnic

7098 Liuxian Bl., Shenzhen 518055, Guangdong (P. R. China)

[b] H. Tong, Dr. W. Liu

School of Chemical Engineering and Technology

Sun Yat-sen University

Zhuhai 519082, Guangdong (P. R. China)

E-mail: liuwei96@mail.sysu.edu.cn

### Materials.

SbCl<sub>3</sub> (99.9% metals basis) were purchased from Alfa Aesar, 1-carboxymethyl-3-methylimidazolium chloride ([HO<sub>2</sub>CMMIm]Cl, 98%) were purchased from Merck, Acetonitrile (>99%) , Ethylacetate (EA, AR, 99% ) were purchased from Aladdin. All reagents and solvents were used without further purification unless otherwise stated.

### Experimental details.

#### Single crystal Synthesis of compound 1-2.

A mixture of SbCl<sub>3</sub> (0.228 g, 1 mmol), 1-carboxymethyl-3-methylimidazolium chloride ([HO<sub>2</sub>CMMIm]Cl, 0.354 g, 2 mmol) in Acetonitrile (20 mL) and Ethylacetate (20 mL) was stirred and heated in 100 mL round bottom flask fitted with a chilled-water cooled condenser allowing the liquid to condense during the experiment. A flask containing these ingredients was heated to 90 °C for 6 hours and colorless crystals of compound **1** slowly precipitated out from the solution on the wall of the flask and the products were separated as soon as they formed. A few hours

later, compound **2** with green emission started to form quickly at the bottom of the flask. Stopped the reaction and cooled slowly to room temperature. To separate the two different phases, crystals **2** were firstly suck out. Crystal sample of **1** were collected by filtration from the reaction solution and washed with a small amount of acetonitrile for three times. These samples were then dried in a vacuum oven overnight before other measurements were made.

**Single crystal X-ray diffraction (SXRD).** Single crystals of  $\text{H}_3(\text{L})_3\text{SbCl}_5 \cdot \text{Cl}$  were selected and diffraction data were collected at 200 K on a Bruker D8 Venture CCD diffractometer with the use of  $\text{I}\mu\text{S}$  3.0 microfocus X-ray Mo K $\alpha$  radiation ( $\lambda = 0.71073 \text{ \AA}$ ). The structures were solved by direct methods and refined by full-matrix least-squares on  $F^2$  using the Bruker SHELXTL package. These data can be obtained free of charge from The Cambridge Crystallographic Data Centre via [www.ccdc.cam.ac.uk/data\\_request/cif](http://www.ccdc.cam.ac.uk/data_request/cif). The CCDC number of compound **1** is 2190859.

**Powder X-ray diffraction (PXRD).** PXRD analyses were performed on Bruker D8 Powder X-ray Diffractometer with Advance automated diffraction system using Cu K $\alpha$  radiation ( $\lambda = 1.5406 \text{ \AA}$ ) at 40 kV/40 mA. The sample pattern was collected at room temperature in a  $2\theta$  range of  $5\text{--}50^\circ$  with a step size of 0.01 and the simulated pattern was calculated by Mercury software using the crystallographic information from cif file.

**Thermogravimetric (TG) analysis.** TG analyse of the compound **1** was measured on a computer-controlled TG 550 system. The powder sample was loaded into platinum pans and heated with a ramp rate of  $10^\circ\text{C}/\text{min}$  from room temperature to  $500^\circ\text{C}$  under a nitrogen flux of  $40 \text{ mL}/\text{min}$ .

**Optical diffuse reflectance measurements.** Optical diffuse reflectance spectra were carried out at room temperature on a Shimadzu UV-3600 spectrophotometer with  $\text{BaSO}_4$  powder as the reflectance reference. Raw data were collected in the wavelength range of 200–800 nm and converted to absorption via the Kubelka-Munk function.

**Microscope.** The microscope images were obtained on Nikon Eclipse Ci-POL microscope with DS-Fi3 camera module under UV (360 nm) LED light source.

**Excitation and photoluminescence spectrum measurements.** Excitation and Steady-state photoluminescence spectra were obtained from 77 K to room temperature using cryostat pattern (by liquid nitrogen) on a Edinburgh Instrument FLS1000 spectrofluorometer.

**Internal quantum yield measurements.** Internal quantum yields (IQYs) of powder sample was acquired on a FS5 fluorescence spectrometer with C9920-03 absolute quantum yield measurement system (Hamamatsu Photonics) with a 150 W xenon monochromatic light source and 3.3 inch integrating sphere.

**Time-resolved photoluminescence.** Time-Resolved Emission data were collected at room temperature using the FLS100 spectrofluorometer. The dynamics of emission decay were monitored by using the FLS1000's time-correlated single-photon counting capability (1024 channels;  $100 \mu\text{s}$  window) using Xe flash lamp as the excitation source. The average lifetime was obtained by mono-exponential fitting as followed:

$$\tau_{\text{ave}} = \frac{A_1\tau_1^2 + A_2\tau_2^2 + A_3\tau_3^2}{A_1\tau_1 + A_2\tau_2 + A_3\tau_3}$$

where  $A_1$ ,  $A_2$ ,  $A_3$  are the pre-exponential factor, and  $\tau_1$ ,  $\tau_2$ ,  $\tau_3$  are the lifetimes components, if necessary.

**DFT calculation:** First-principle calculations of the density of states (DOS) of compounds **1** were carried out using the CASTEP code implemented in the Material studio. Generalized gradient approximations (GGA) with Perdew–Burke–Ernzerhof (PBE) exchange-correlation functional (xc) were used in all calculations. The plane-wave basis set energy cutoff was set at 10.0 eV, ultrasoft pseudopotentials were used for all chemical elements and the total energy tolerance was set to be  $1 \times 10^{-5} \text{ eV}/\text{atom}$ .

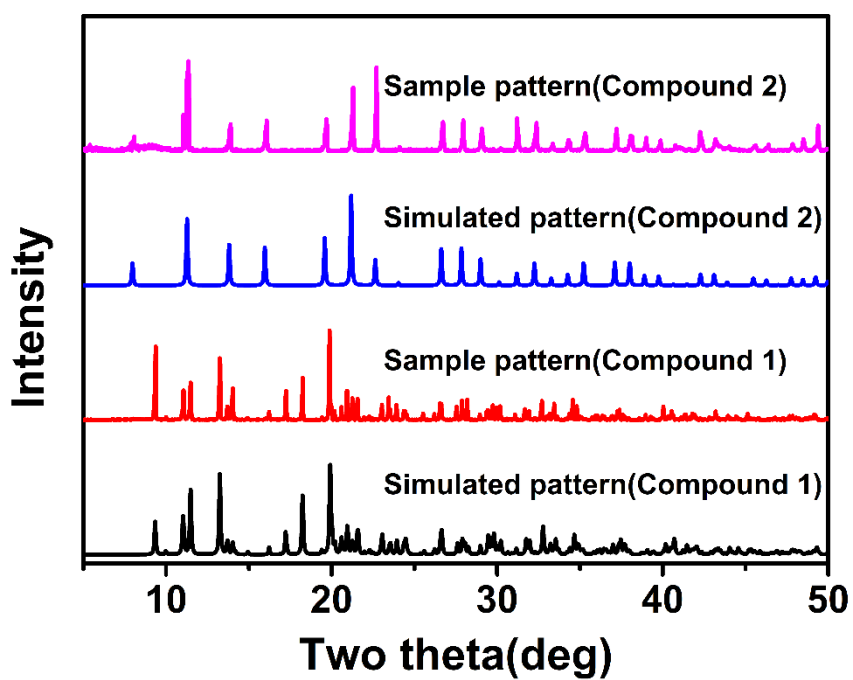

Figure S1. PXRD patterns of simulated pattern of compound 1 compound 2.

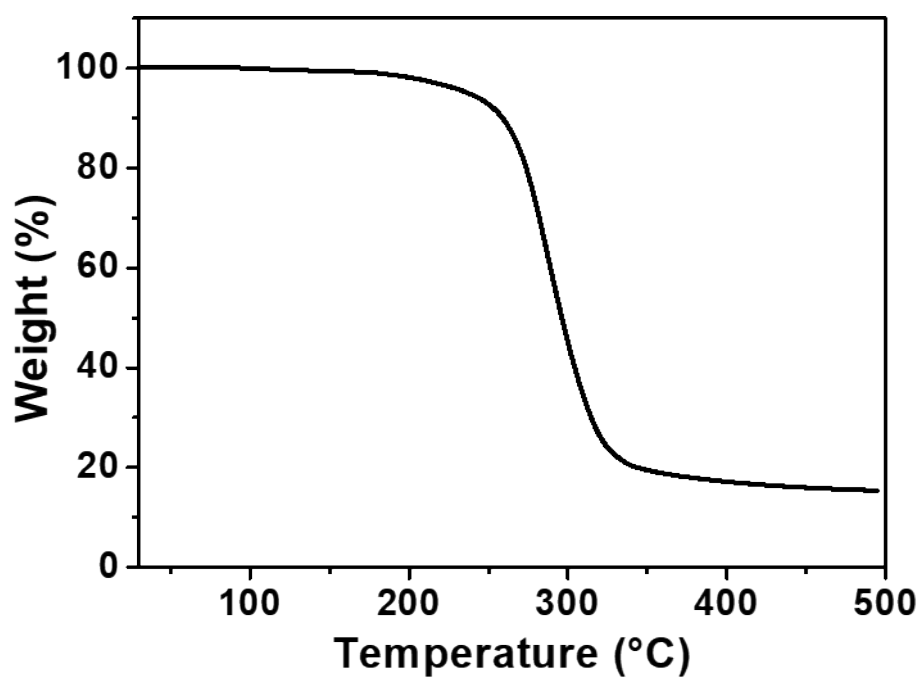

Figure S2. TG plot of compound 1.

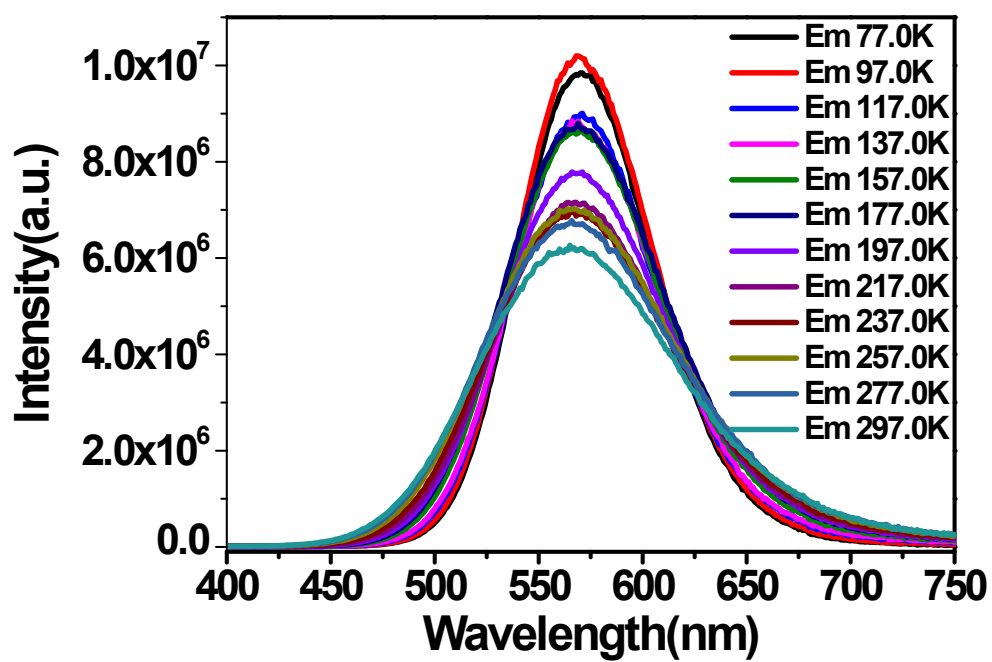

Figure S3. Temperature-dependent photoluminescence spectra of compound 1 under 340 nm excitation.

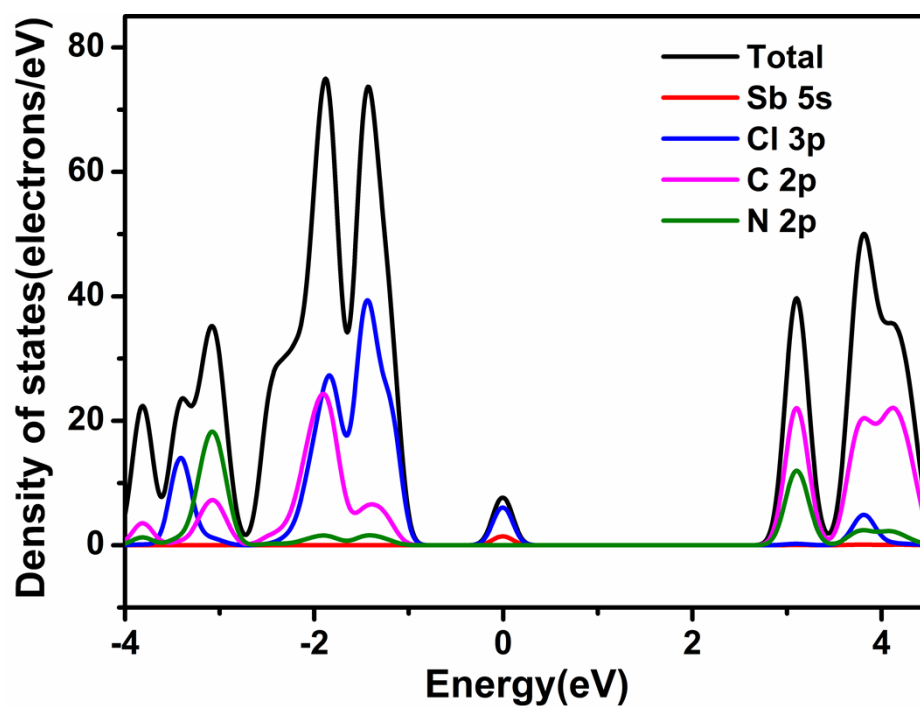

Figure S4. Density of states plot of compound 2.

**Table S1.** Single crystal X-ray diffraction data of compound **1**

|                              |                        |
|------------------------------|------------------------|
| <b>Empirical formula</b>     | <b>C18H27N6O6SbCl6</b> |
| <b>Formula mass</b>          | 757.92                 |
| <b>Space group</b>           | P21/c                  |
| <b>a/Å</b>                   | 20.8758(6)             |
| <b>b/Å</b>                   | 8.7858(2)              |
| <b>c/Å</b>                   | 17.7065(4)             |
| <b><math>\alpha</math>/°</b> | 90                     |
| <b><math>\beta</math>/°</b>  | 114.926(1)             |
| <b><math>\gamma</math>/°</b> | 90                     |
| <b>V/Å<sup>3</sup></b>       | 2945.06(13)            |
| <b>Z</b>                     | 4                      |
| <b><math>\lambda</math></b>  | 0.71073                |
| <b>T/K</b>                   | 200K                   |
| <b>R<sup>1</sup>[a]</b>      | 0.0501                 |
| <b>wR<sup>2</sup></b>        | 0.0948                 |

**Table S2.** Selected bond angles for compound **1** and **2**.

| <b>1</b> |      |      |           | <b>2</b>           |      |                    |          |
|----------|------|------|-----------|--------------------|------|--------------------|----------|
| Atom     | Atom | Atom | Angle/°   | Atom               | Atom | Atom               | Angle/°  |
| Cl1      | Sb   | Cl2  | 97.25(3)  | Cl1 <sup>i</sup>   | Sb   | Cl1 <sup>v</sup>   | 91.28(2) |
| Cl1      | Sb   | Cl3  | 173.06(3) | Cl1 <sup>v</sup>   | Sb   | Cl1 <sup>iii</sup> | 88.02(2) |
| Cl3      | Sb   | Cl2  | 83.97(3)  | Cl1 <sup>ii</sup>  | Sb   | Cl1 <sup>iii</sup> | 91.98(2) |
| Cl4      | Sb   | Cl1  | 90.97(3)  | Cl1 <sup>v</sup>   | Sb   | Cl1 <sup>iv</sup>  | 88.02(2) |
| Cl4      | Sb   | Cl2  | 171.75(3) | Cl1 <sup>i</sup>   | Sb   | Cl1 <sup>iv</sup>  | 88.02(2) |
| Cl4      | Sb   | Cl3  | 87.78(3)  | Cl1 <sup>iv</sup>  | Sb   | Cl1 <sup>iii</sup> | 91.98(2) |
| Cl5      | Sb   | Cl1  | 85.72(3)  | Cl1 <sup>v</sup>   | Sb   | Cl1                | 91.98(2) |
| Cl5      | Sb   | Cl2  | 89.10(3)  | Cl1 <sup>iv</sup>  | Sb   | Cl1 <sup>ii</sup>  | 91.28(2) |
| Cl5      | Sb   | Cl5  | 87.48(3)  | Cl1 <sup>i</sup>   | Sb   | Cl1                | 91.28(2) |
|          |      |      |           | Cl1 <sup>ii</sup>  | Sb   | Cl1                | 88.02(2) |
|          |      |      |           | Cl1 <sup>i</sup>   | Sb   | Cl1 <sup>ii</sup>  | 88.02(2) |
|          |      |      |           | Cl1 <sup>iii</sup> | Sb   | Cl1 <sup>ii</sup>  | 88.02(2) |

**Table S3.** Bond lengths for compound **1** and **2**.

| <b>1</b> |      |                      | <b>2</b> |       |                      |
|----------|------|----------------------|----------|-------|----------------------|
| Atom     | Atom | Length/ <sup>o</sup> | Atom     | Atom  | Length/ <sup>o</sup> |
| Sb       | Cl1  | 2.5828(10)           | Sb       | Cl1   | 2.6470(6)            |
| Sb       | Cl2  | 2.7334(10)           | Sb       | Cl1#1 | 2.6470(6)            |
| Sb       | Cl3  | 2.6612(10)           | Sb       | Cl1#1 | 2.6470(5)            |
| Sb       | Cl4  | 2.5444(10)           | Sb       | Cl1#1 | 2.6470(6)            |
| Sb       | Cl5  | 2.4029(9)            | Sb       | Cl1#1 | 2.6470(6)            |
|          |      |                      | Sb       | Cl1#1 | 2.6470(5)            |

Symmetry transformations used to generate equivalent atoms: #1 (1-y, x-y, z), (1/3+x-y, -1/3+x, 2/3-z), (1/3+y, 2/3-x+y, 2/3-z), (4/3-x, 2/3-y, 2/3-z) 2.6471(5), (1-x+y, 1-x, z).

**Table S4.** Hydrogen bonds for compound **1**.

| D-H...A                 | d(D-H) | d(H...A) | d(D...A) | Angle(DHA) |
|-------------------------|--------|----------|----------|------------|
| O(2)-H(2)...<br>Cl(6)   | 0.84   | 2.30     | 3.097(3) | 159.0      |
| O(3)-H(3A)<br>...Cl(6)  | 0.84   | 2.17     | 2.997(3) | 168.0      |
| C(2)-H(2B)<br>...Cl(2)  | 0.99   | 2.09     | 3.444(4) | 115.0      |
| C(3)-H(3)...<br>Cl(2)   | 0.95   | 2.73     | 3.574(4) | 148.4      |
| C(16)-H(16)<br>...Cl(2) | 0.95   | 2.85     | 3.622(4) | 139.1      |
| C(8)-H(8A)<br>...Cl(3)  | 0.99   | 2.65     | 3.569(4) | 154.0      |
| C(8)-H(8A)<br>...Cl(4)  | 0.99   | 2.95     | 3.620(4) | 125.5      |
| C(9)-H(9)...<br>Cl(5)   | 0.95   | 2.73     | 3.544(4) | 145.9      |

**Table S5.** Hydrogen bonds for compound **2**.

| D-H...A                | d(D-H) | d(H...A) | d(D...A) | ∠(DHA) |
|------------------------|--------|----------|----------|--------|
| C(2)-H(2A)<br>...Cl(1) | 0.97   | 2.85     | 3.539(2) | 128.7  |
| C(3)-H(3)...<br>Cl(1)  | 0.93   | 2.98     | 3.433(2) | 111.9  |
| C(3)-H(3)...<br>Cl(1)  | 0.93   | 2.78     | 3.624(2) | 151.0  |
